# Supplementary material
Source: Springer Nature journal article supplement (https://www.springermedizin.de/resource/supplementary/12936_2010_1677_MOESM3_ESM.pdf/9542336)

Absorbance (AU 320 nm)

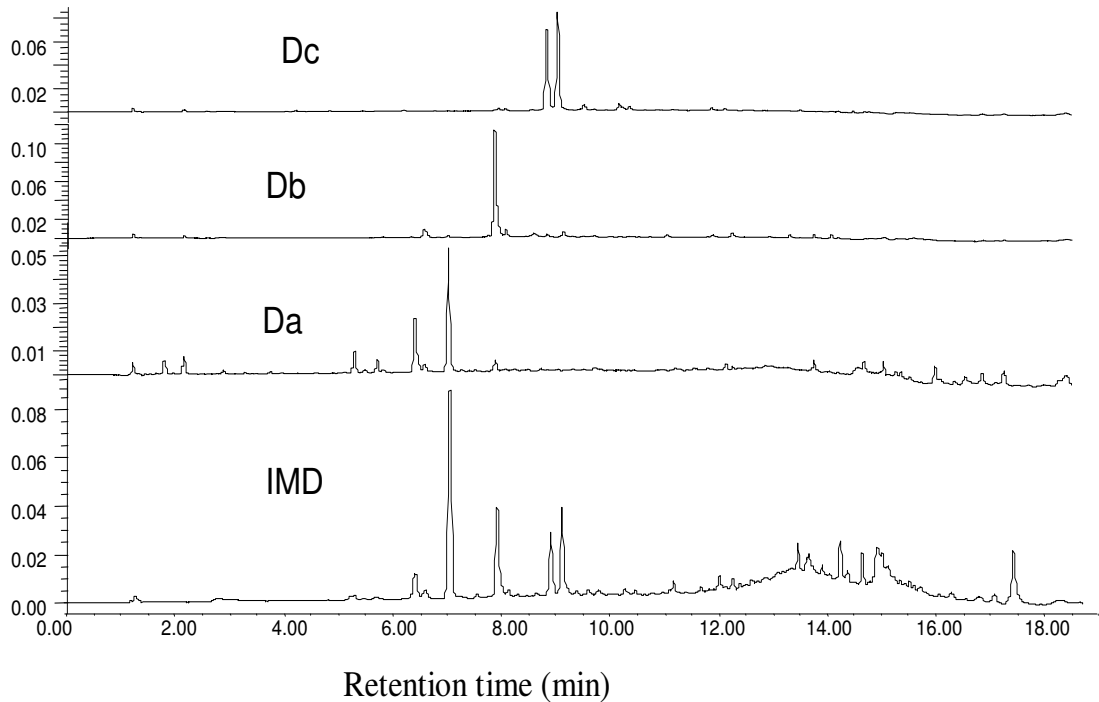

Supplement: MOESM3 [file 9542336]
